# Supplementary material for: Facile synthesis of poly(N-vinyl pyrrolidone) block copolymers with “more-activated” monomers by using photoinduced successive RAFT polymerization
Source: Royal Society of Chemistry journal article supplement (doi:10.1039/c9py01763a), 2020-01-01
Supplement: c9py01763a1.pdf [file c9py01763a1.pdf]

## Electronic Supporting Information (ESI)

### Facile synthesis of poly(N-vinyl pyrrolidone) block copolymers with “more-activated” monomers by using photoinduced successive RAFT polymerization

Yingjie Wang,<sup>‡,1</sup> Mengqi Wang,<sup>‡,1</sup> Liangjiu Bai,<sup>2</sup> Lifan Zhang,<sup>\*,1</sup> Zhenping Cheng,<sup>\*,1</sup> and Xiulin Zhu<sup>1</sup>

<sup>1</sup>Suzhou key Laboratory of Macromolecular Design and Precision Synthesis, Jiangsu Key Laboratory of Advanced Functional Polymer Design and Application, State and Local Joint Engineering Laboratory for Novel Functional Polymeric Materials College of Chemistry, Chemical Engineering and Materials Science, Soochow University, Suzhou 215123, China. <sup>2</sup>School of Chemistry and Materials Science, Ludong University, Key Laboratory of High Performance and Functional Polymers in the Universities of Shandong Province, Yantai 264025, China.

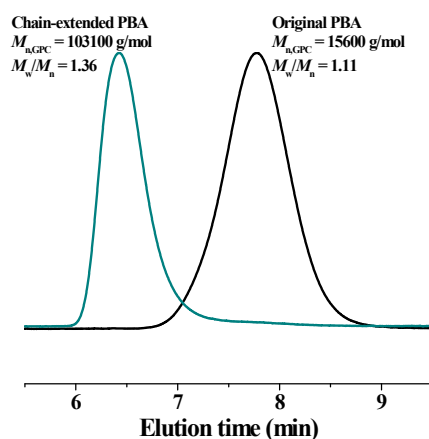

**Fig. S1** GPC traces of (a) PBA homopolymer mediated by PXPE and (b) chain extensions with fresh BA under irradiation with purple LED light at room temperature (25 °C). Polymerization conditions:  $[BA]_0/[PBA]_0 = 1000/1$ ,  $V_{BA} = 0.5$  mL, bulk, under irradiation with purple LED light ( $0.6$  mW/cm<sup>2</sup>,  $\lambda_{max} = 391$  nm),  $t = 20$  min, conversion = 65.5%. For PBA macro-RAFT agent:  $M_{n,GPC} = 15600$  g/mol,  $M_w/M_n = 1.11$ .

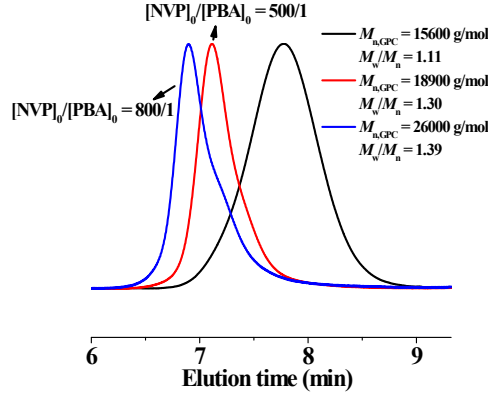

**Fig. S2** GPC traces of the PBA homopolymer and corresponding PBA-*b*-PNVP block copolymers after chain extension. Polymerization conditions:  $[NVP]_0/[PBA]_0 = X/1$  ( $X = 500$  ( $t = 2.5$  h, conversion = 24.4%), 800 ( $t = 2.5$  h, conversion = 31.1%)),  $V_{BA} = 0.5$  mL, bulk, under irradiation with purple LED light ( $0.6$  mW/cm<sup>2</sup>,  $\lambda_{max} = 391$  nm), 25 °C. For PBA macro-RAFT agent:  $M_{n, GPC} = 15600$  g/mol,  $M_w/M_n = 1.11$ .

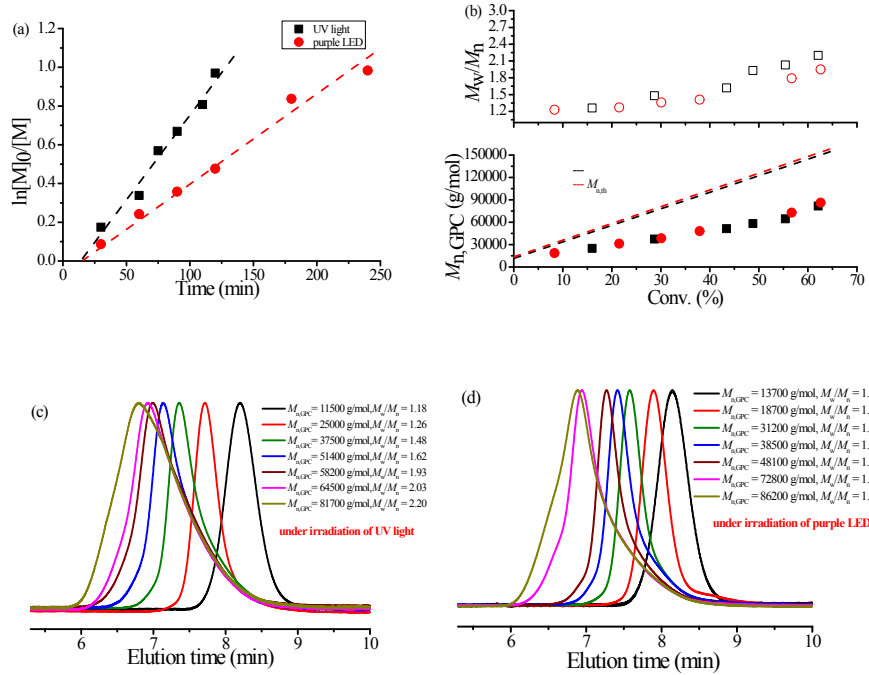

**Fig. S3** (a)  $\ln([M]_0/[M])$  as a function of time, (b) number-average molecular weight ( $M_{n, GPC}$ ) and molecular weight distribution ( $M_w/M_n$ ) versus monomer conversion, (c) and (d) GPC traces of the PBA homopolymers mediated by PXPE and its corresponding PBA-*b*-PNVP block copolymers after chain-extension. Polymerization conditions:  $[NVP]_0/[PBA]_0 = 2000/1$ ,  $V_{NVP} = 0.5$  mL, 25 °C, bulk, under irradiation with UV light ( $9.6$  mW/cm<sup>2</sup>,  $\lambda_{max} = 365$  nm) and purple LED light ( $0.6$  mW/cm<sup>2</sup>,  $\lambda_{max} = 391$  nm). For PBA macro-RAFT agent:  $M_{n, GPC} = 11500$  g/mol,  $M_w/M_n = 1.18$  and  $M_{n, GPC} = 13700$  g/mol,  $M_w/M_n = 1.14$ .

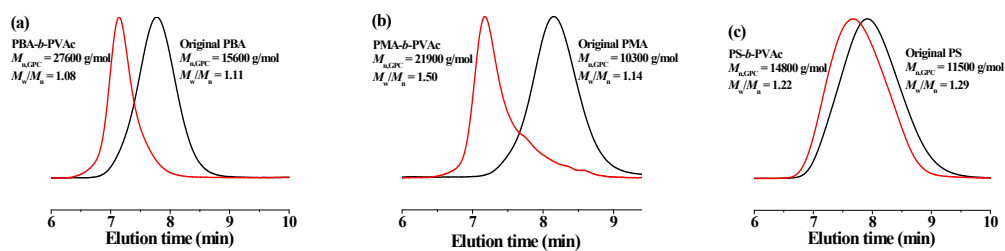

**Fig. S4** GPC traces of (a) PBA-*b*-PVAc ( $t = 22$  h, conversion = 16.1%), (b) PMA-*b*-PVAc ( $t = 22$  h, conversion = 22.5%) and (c) PS-*b*-PVAc ( $t = 22$  h, conversion = 4.7%) copolymers using PBA, PMA and PS as the macro-RAFT agent, respectively. Polymerization conditions:  $[M]_0/[macro-RAFT\ agent]_0 = 1000/1$ ,  $V_M = 0.5$  mL, bulk, under irradiation with purple LED ( $0.6\text{ mW/cm}^2$ ,  $\lambda_{max} = 391\text{ nm}$ ),  $25\text{ }^\circ\text{C}$ .
